# Supplementary material
Source: HighWire-hosted journal article supplement (https://erj.ersjournals.com/highwire/filestream/131503/field_highwire_adjunct_files/0/ERJ-00280-2016_Supplement.pdf)
Supplement: ERJ-00280-2016_Supplement.pdf [file ERJ-00280-2016_Supplement.pdf]

## Online Supplementary Appendices

**Appendix 1:** Definition of major and clinically relevant non-major bleeding events.

Major bleeding was defined based on the criteria of the International Society on Thrombosis and Hemostasis (ISTH): 1) fatal bleeding, and/or 2) symptomatic bleeding in a critical area or organ, such as intracranial, intraspinal, intraocular, retroperitoneal, intra-articular, pericardial, or intramuscular with compartment syndrome, and/or 3) bleeding causing a drop of hemoglobin level of 20 g/L (1.24 mmol/L) or more, or leading to transfusion of two or more units of red blood cells [17].

Clinically relevant non-major bleeding was defined by the presence of at least one of the following criteria: (i) spontaneous skin hematoma of at least 2.5 cm in diameter; (ii) spontaneous nose bleed of more than 5 minutes duration; (iii) macroscopic hematuria (either spontaneous or, if associated with an intervention, lasting more than 24 hours); (iv) spontaneous rectal bleeds (more than spotting on toilet paper); (v) gingival bleeding for more than five minutes; (vi) bleeds leading to hospitalisation and/or requiring surgical treatment; (vii) bleeds leading to a transfusion of less than two units; or (viii) any other bleeding event considered clinically relevant by the investigator.

## **Appendix 2:** Overview of variables (with definitions) included in analysis

- Age (years)
- Sex (male versus female)
- Male patients with age  $\geq 70$  years
- Uncontrolled Arterial hypertension at baseline (systolic blood pressure  $\geq 140$  mm Hg)
- Male patients with uncontrolled arterial hypertension at baseline (systolic blood pressure  $\geq 140$  mm Hg)
- BMI
- Age  $\geq 70$  years, BMI  $\geq 30$  kg/m<sup>2</sup>
- Race (Asian, black, white)
- Region (per continent)
- Previous VTE
- Pulmonary embolism (versus DVT)
- Known thrombophilia
- History of bleeding: Major or non-major clinically relevant bleeding event” or “Rectal bleeding” or “Frequent nose bleeding” or “Hematuria”
- Self-reported smoking history (never smoked, ever smoked)
- Active cancer
- History of non-hemorrhagic stroke or transient ischaemic attack
- Known coronary artery disease
- Known heart failure
- Known liver disease or elevated liver enzymes at baseline ( $>$  normal value)
- History of gastric or duodenal ulcer
- Known gastro-esophageal reflux disease, gastritis, hiatal hernia
- Diabetes mellitus
- Renal dysfunction (estimated glomerular filtration rate 30-60 ml/min)
- Anaemia (Hb  $< 12$  g/dL in men or  $< 11$  g/dL in women)
- Platelet count  $< 100 \times 10^9$ /L
- Platelet aggregation inhibitors (e.g. acetylsalicylic acid, clopidogrel, ticagrelor, or prasugrel)
- Baseline use of non-steroidal anti-inflammatory drugs
- Baseline application of thrombolytic drugs
- Active depression
- Use of selective serotonin re-uptake inhibitors or selective serotonin norepinephrine re-uptake inhibitors
- Baseline use of verapamil, amiodarone, dronedarone, or quinidine
- Baseline use of ritonavir or saquinavir
- Baseline use of clarithromycin
- Baseline use of systemic glucocorticoids

**Appendix 3:** Overview of existing bleeding prediction scores that were compared to the newly derived prediction score (Table adapted from reference 9).

| Score                           | Kuijer score [5]  |     | RIETE score [7]         |              | HEMORR <sub>2</sub> HAGES [12]                  |   | HAS-BLED [10]                                   |   | ATRIA [11]                           |   | OBRI [6]                             |   |
|---------------------------------|-------------------|-----|-------------------------|--------------|-------------------------------------------------|---|-------------------------------------------------|---|--------------------------------------|---|--------------------------------------|---|
| Score items (points)            | Age >60 years     | 1.6 | Recent bleeding         | 2            | Hepatic or renal disease <sup>2</sup>           | 1 | Hypertension <sup>6</sup>                       | 1 | Anaemia <sup>1</sup>                 | 3 | Age ≥ 65 years                       | 1 |
|                                 | Female sex        | 1.3 | Abnormal renal function | 1.5          | Ethanol abuse <sup>2</sup>                      | 1 | Abnormal liver function <sup>7</sup>            | 1 | Severe renal disease <sup>13</sup>   | 3 | History of GI tract bleeding         | 1 |
|                                 | Active malignancy | 2.2 | Anaemia <sup>1</sup>    | 1.5          | Malignancy                                      | 1 | Abnormal renal function <sup>8</sup>            | 1 | Age ≥75 years                        | 2 | History of stroke                    | 1 |
|                                 |                   |     | Age >75 years           | 1            | Age ≥75 years                                   | 1 | Stroke                                          | 1 | Previous hemorrhage                  | 1 | ≥1 comorbid conditions <sup>15</sup> | 1 |
|                                 |                   |     | Active malignancy       | 1            | Reduced platelet count or function <sup>3</sup> | 1 | Bleeding history or predisposition <sup>9</sup> | 1 | Diagnosed hypertension <sup>14</sup> | 1 |                                      |   |
|                                 |                   |     | PE diagnosis            | 1            | Prior bleeding                                  | 2 | Labile INR <sup>10</sup>                        | 1 |                                      |   |                                      |   |
|                                 |                   |     |                         |              | Hypertension <sup>2</sup>                       | 1 | Age ≥65 years                                   | 1 |                                      |   |                                      |   |
|                                 |                   |     |                         |              | Anaemia <sup>1</sup>                            | 1 | Drug abuse <sup>11</sup>                        | 1 |                                      |   |                                      |   |
|                                 |                   |     |                         |              | Genetic factors <sup>4</sup>                    | 1 | Alcohol abuse <sup>12</sup>                     | 1 |                                      |   |                                      |   |
|                                 |                   |     |                         |              | Excessive fall risk <sup>5</sup>                | 1 |                                                 |   |                                      |   |                                      |   |
|                                 |                   |     |                         | Prior stroke | 1                                               |   |                                                 |   |                                      |   |                                      |   |
| <b>Original risk categories</b> |                   |     |                         |              |                                                 |   |                                                 |   |                                      |   |                                      |   |
| Low risk                        | 0 points          |     | 0 points                |              | 0-1 points                                      |   | 0 points                                        |   | 0-3 points                           |   | 0 points                             |   |
| Intermediate risk               | 1-3 points        |     | 1-4 points              |              | 2-3 points                                      |   | 1-2 points                                      |   | 4 points                             |   | 1-2 points                           |   |
| Elevated risk                   | >3 points         |     | >4 points               |              | >3 points                                       |   | >2 points                                       |   | >4 points                            |   | 3-4 points                           |   |

GI=gastrointestinal; PE= pulmonary embolism

<sup>1</sup>Anaemia was defined as hemoglobin level <13 g/L in men (8.1 mmol/L) and <12 g/L in woman (7.4 mmol/L), renal insufficiency as creatinine levels >1.2 mg/dL (106 mmol/L).

<sup>2</sup>Hepatic or renal disease, ethanol abuse and hypertension were not further defined and, for the purpose of this analysis, scored according to identical criteria as for the HAS-BLED score.

<sup>3</sup>Reduced platelet count or function was defined as use of platelet-aggregation inhibitors or thrombocytopenia.

<sup>4</sup>Genetic factors was defined as CYP 2C9 single-nucleotide polymorphisms; since CYP 2C9 single-nucleotide polymorphisms were not assessed as part of this study, all patients were scored 0 points.

<sup>5</sup>Excessive fall risk included neuropsychiatric disease.

<sup>6</sup>Hypertension was defined as “uncontrolled”, or systolic blood pressure >160 mm Hg.

<sup>7</sup>Abnormal liver function was defined as chronic hepatic disease (e.g., cirrhosis) or biochemical evidence of significant hepatic derangement (liver enzymes >2-3x the upper limit of normal).

<sup>8</sup>Abnormal kidney function was defined as the need for chronic dialysis, renal transplantation or serum creatinine >200 mmol/L.

<sup>9</sup>Bleeding predisposition was defined as “anaemia” without further details. For the current analysis, we defined anaemia as hemoglobin level <13 g/L in men (8.1 mmol/L) and <12 g/L in women (7.4 mmol/L).

<sup>10</sup>Labile INR was defined as therapeutic time in range <60%; all patients were scored with 0 points for “labile INR” since therapeutic anticoagulation with VKA was not initiated yet at baseline, or patients were treated with dabigatran.

<sup>11</sup>Alcohol abuse was defined as consumption of >8 units of alcoholic drinks per week.

<sup>12</sup>Drugs refers to any medications that increase bleeding risk during anticoagulation, such as aspirin, non-steroidal anti-inflammatory drugs or steroids.

<sup>13</sup>Severe renal disease was defined as an estimated glomerular filtration rate <30 ml/min.

<sup>14</sup>Diagnosed hypertension was not further defined; we awarded points when the criteria for hypertension according to HAS-BLED were met.

<sup>15</sup>Recent myocardial infarction, anaemia (hematocrit <30%), renal impairment (creatinine level >1.5 mg/dL), or diabetes mellitus.
